# Supplementary material for: Reconstructing the origin and dispersal patterns of village chickens across East Africa: insights from autosomal markers
Source: PubMed Central journal article supplement (PMC3664419; doi:10.1111/mec.12294), 2013-04-24
Supplement: mec0022-2683-SD1.pdf [file mec0022-2683-SD1.pdf]

## Supplementary Figure S1

Model 1: Populations are admixed and their allele frequencies are correlated

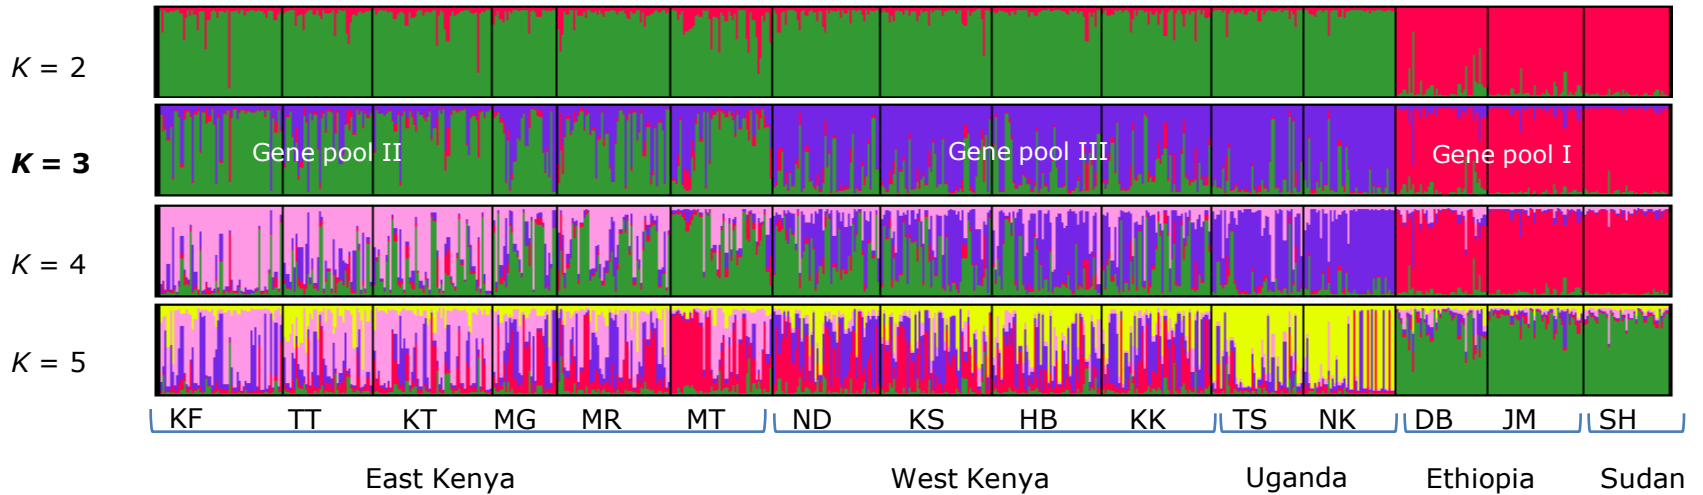

Model 2: Populations are admixed but their allele frequencies are independent

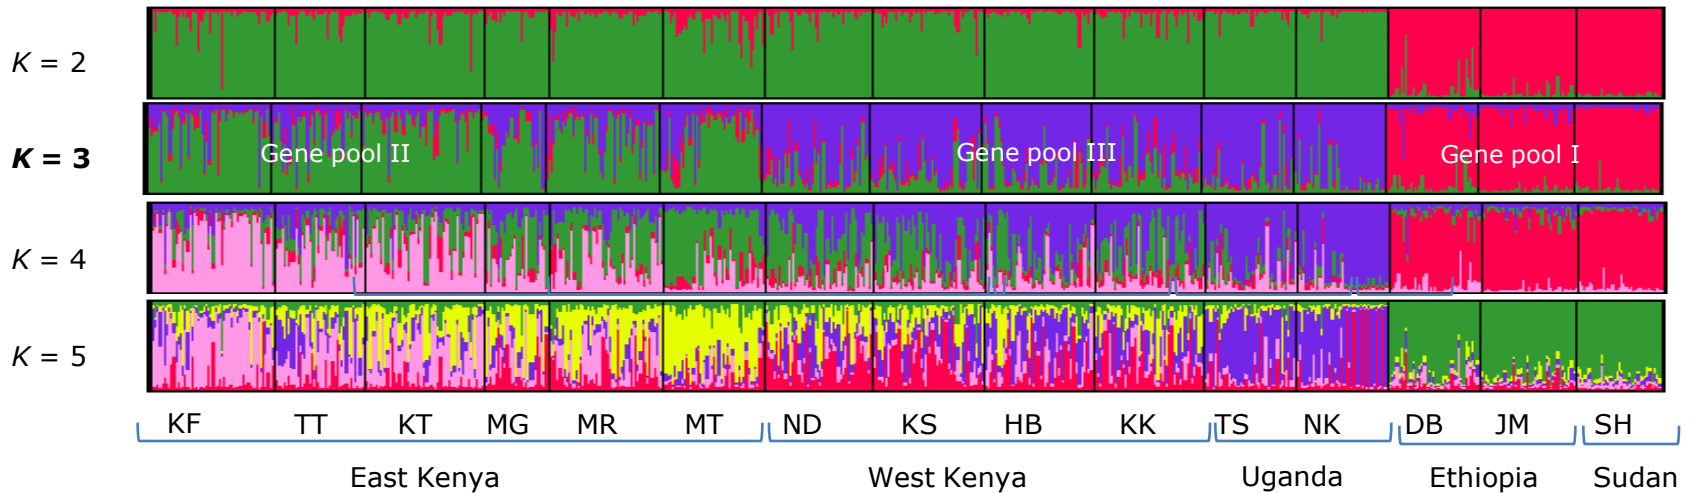

# Supplementary Figure S1 continued

Model 4: No admixture between populations and their allele frequencies are correlated

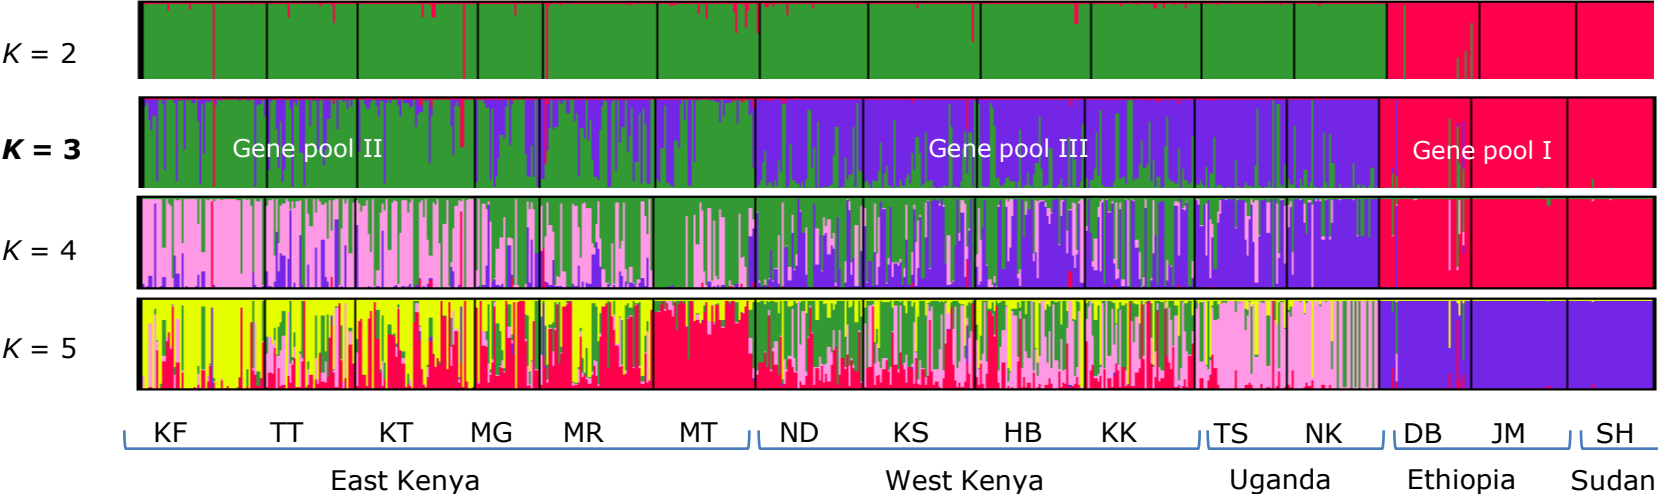

## Supplementary Figure S2

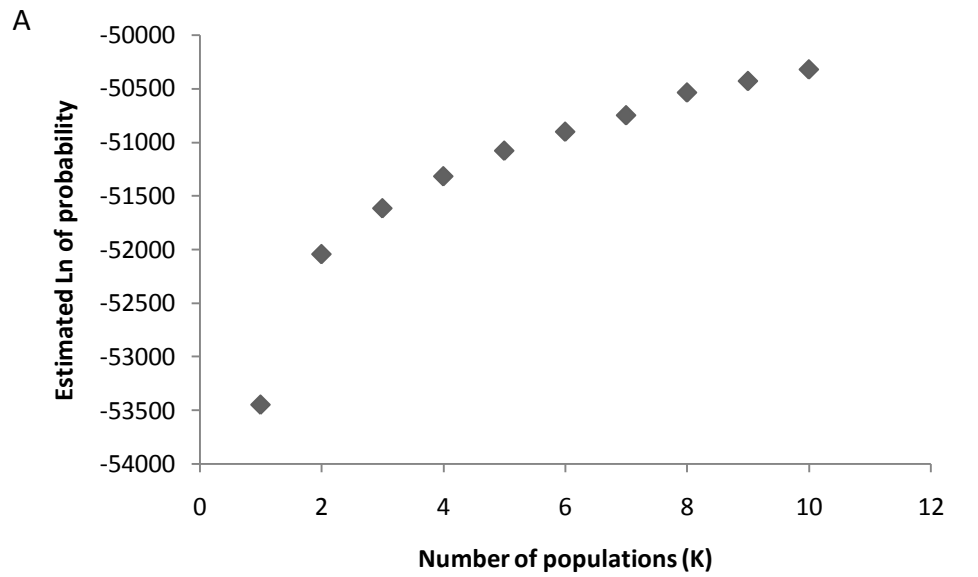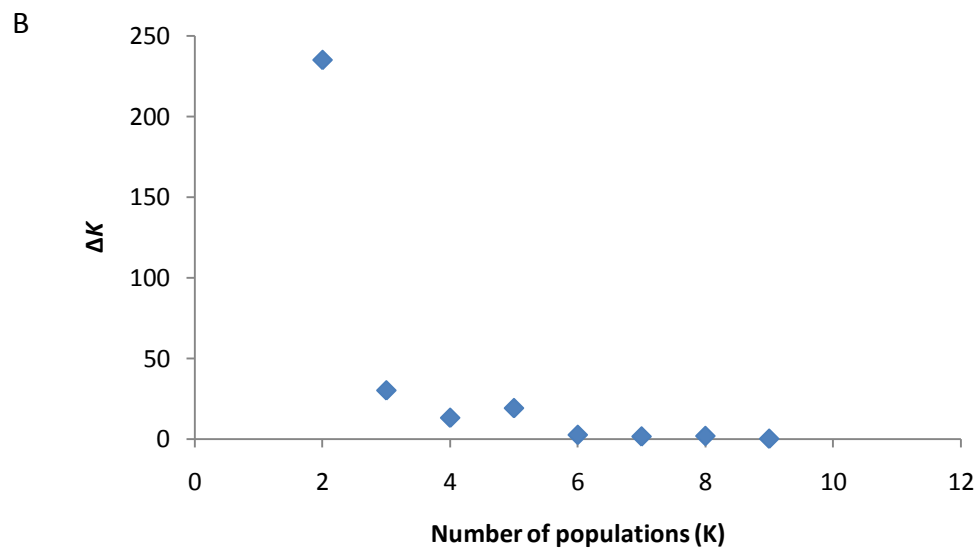

# Supplementary Figure S3

Supplementary Figure S3a

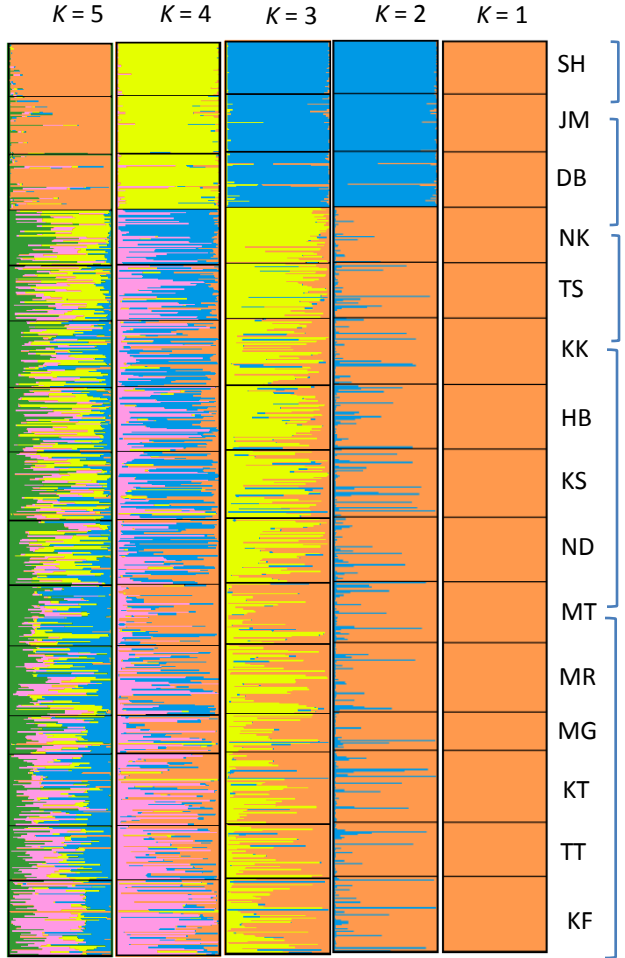

Supplementary Figure S3b

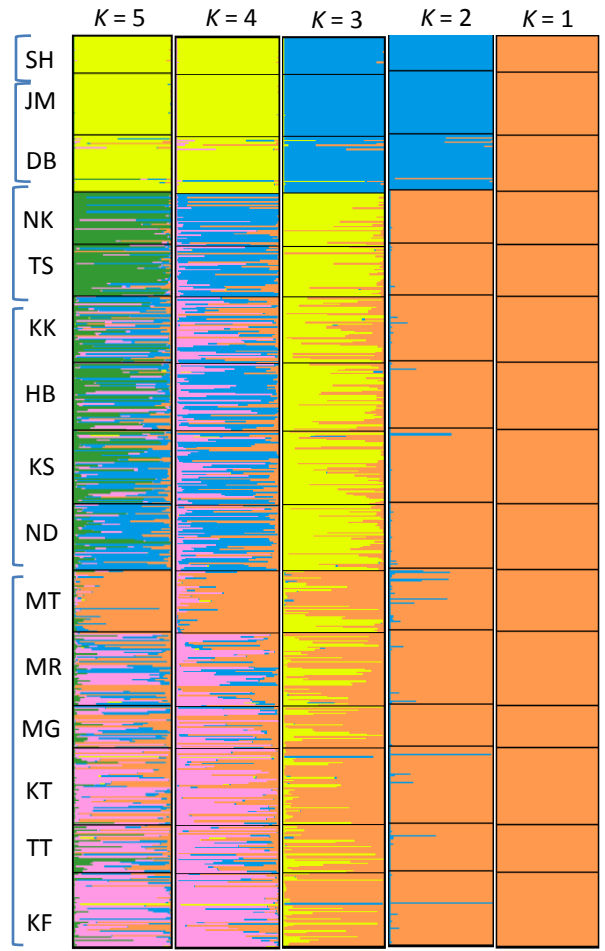

# Supplementary Figure S4

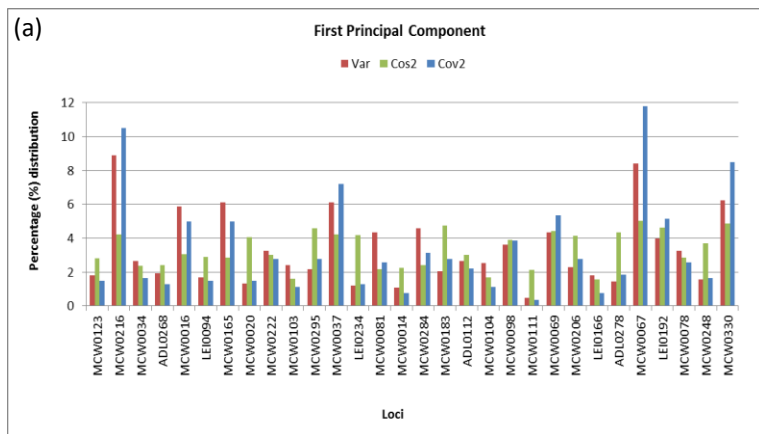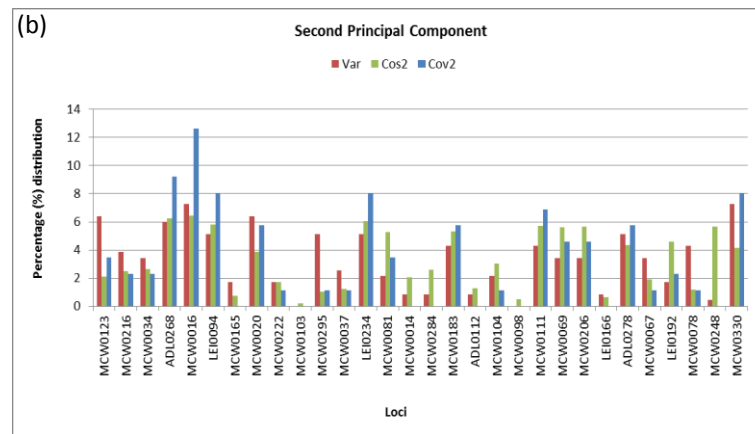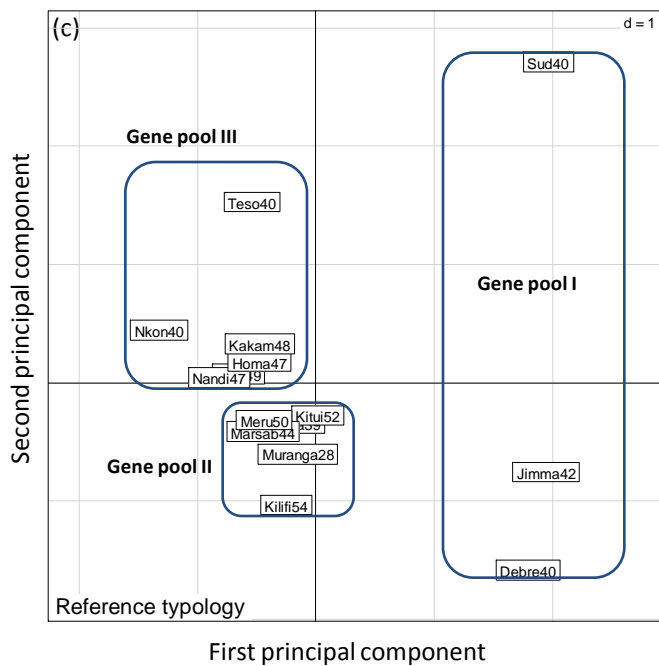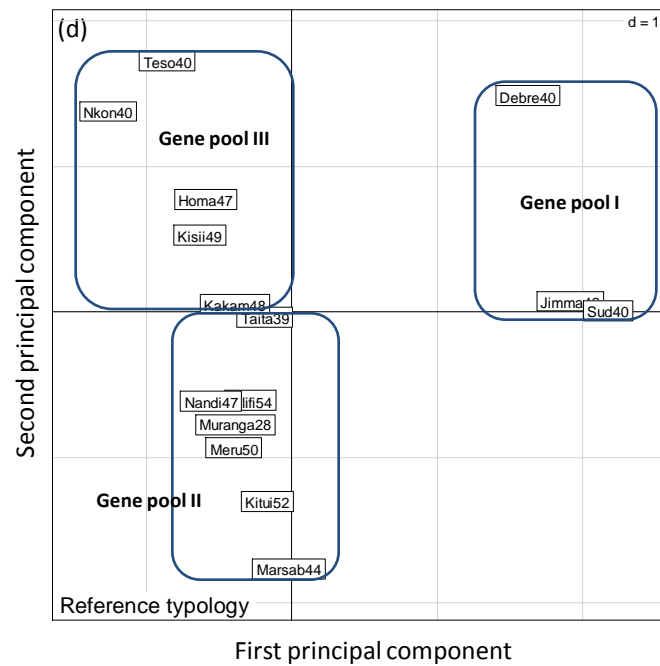

# Supplementary Figure S5

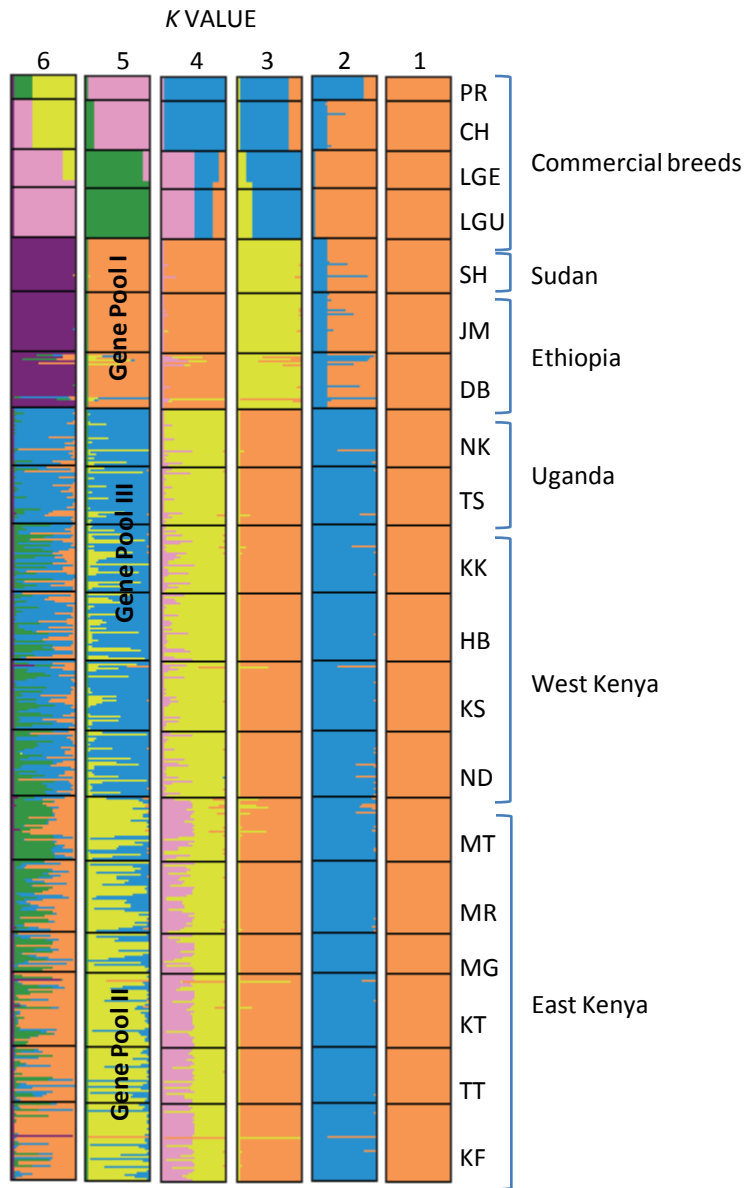

Figure S5a

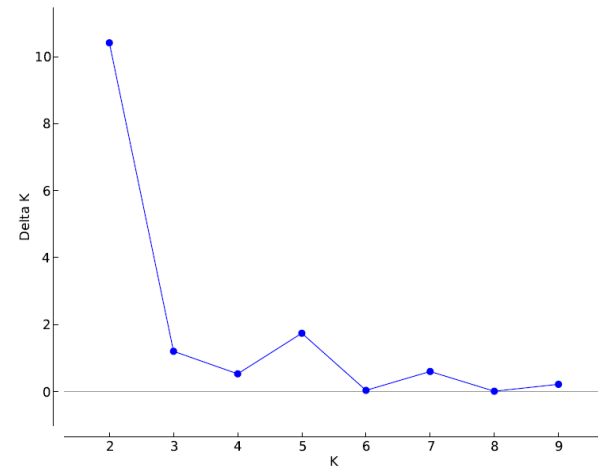

Figure S5b

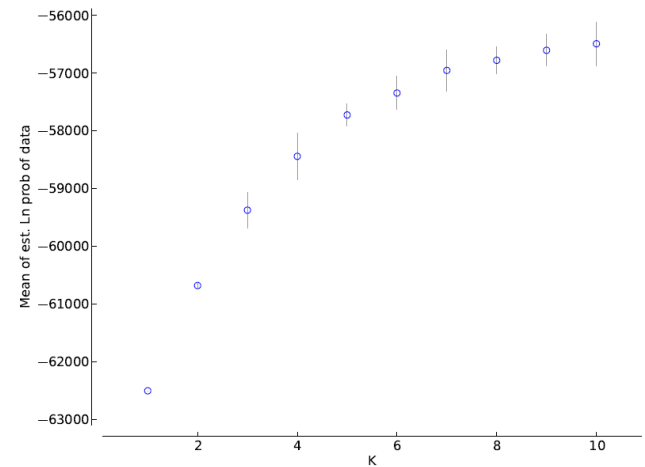

Figure S5c

## Supplementary Figure S6

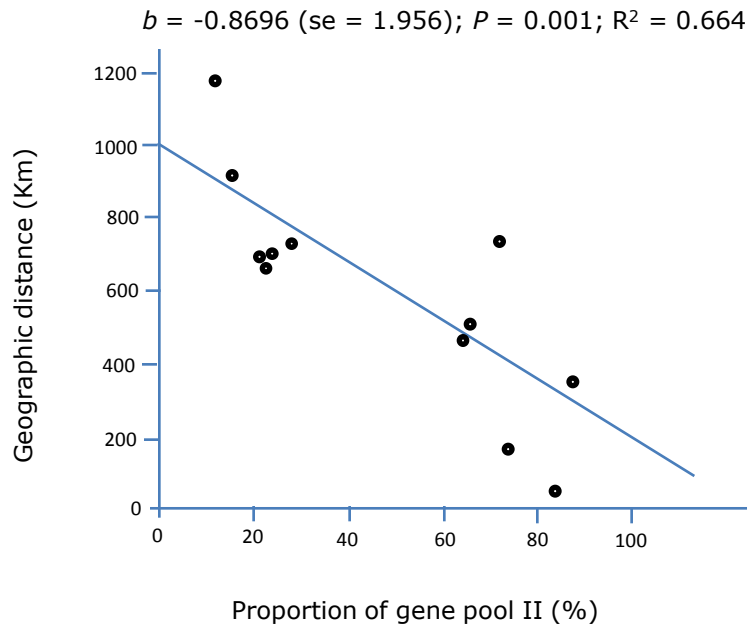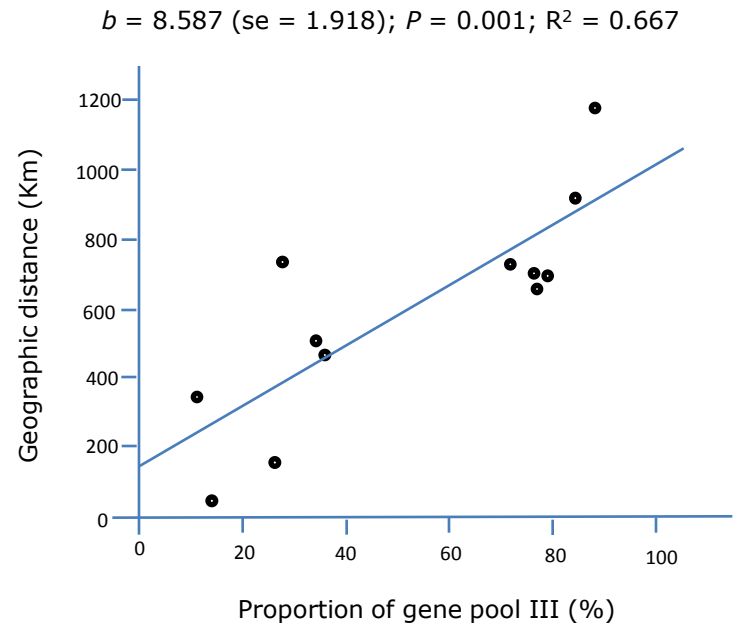

# Supplementary Figure S7

(a)

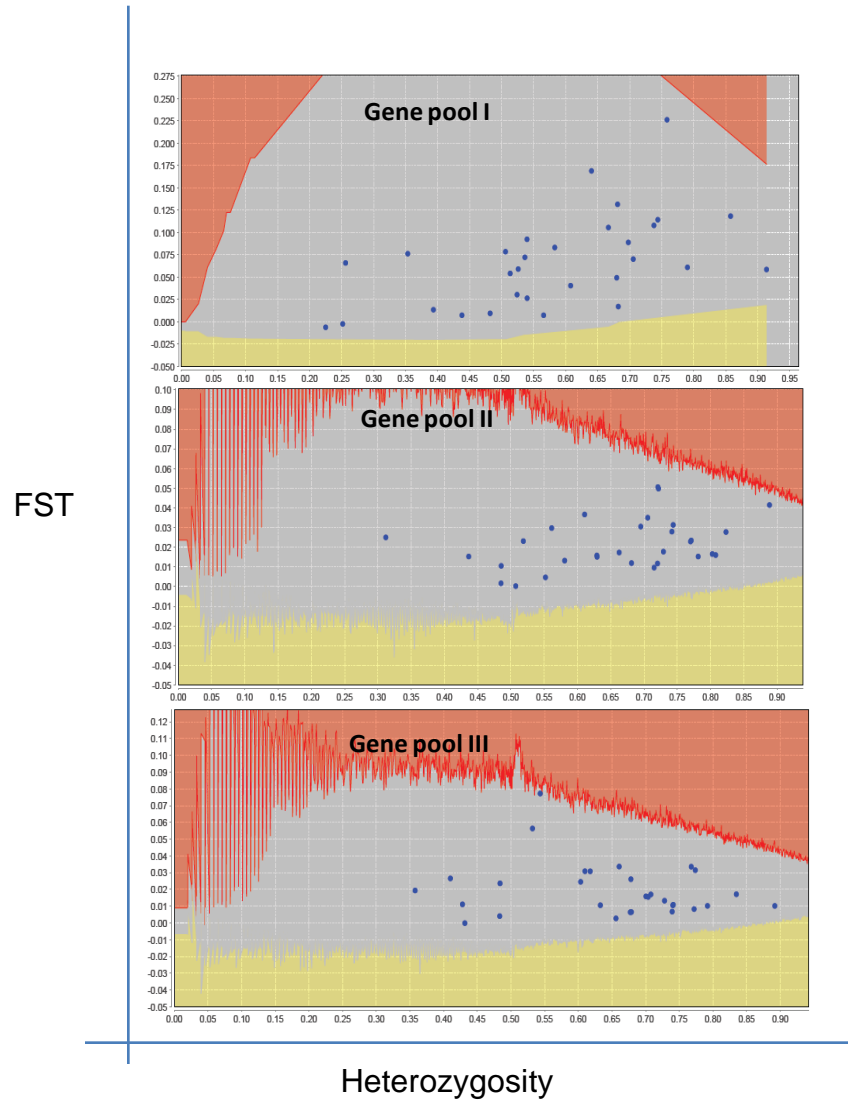

(b)

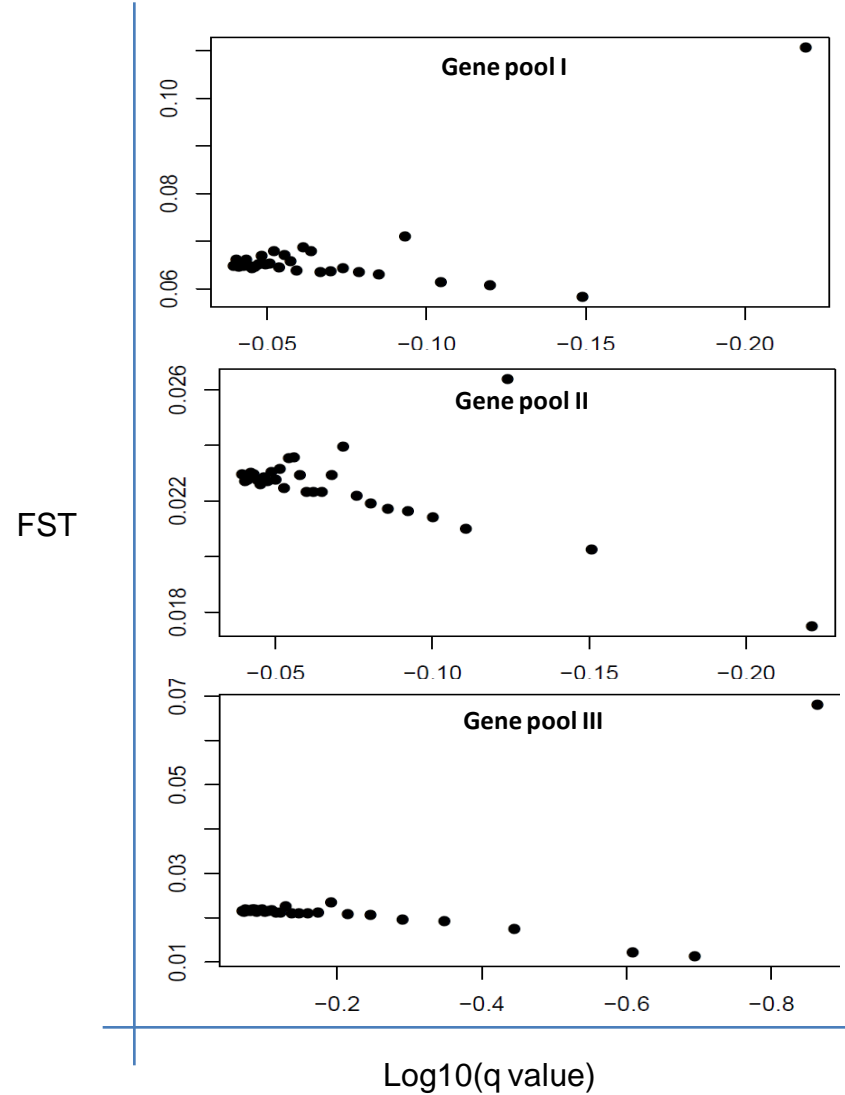

● Markers — Candidate balancing selection — Candidate neutral — Candidate positive selection



# Supplementary Figure S8

## mtDNA haplogroups

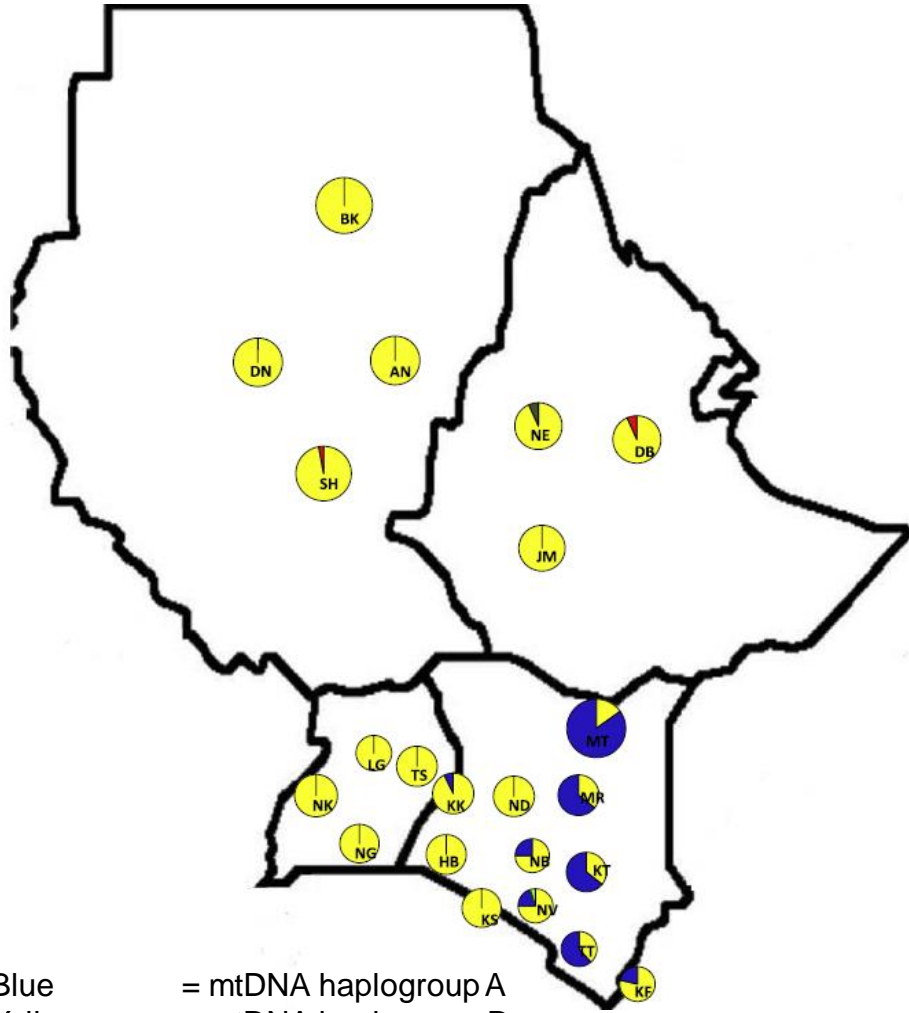

Blue  
Yellow

= mtDNA haplogroup A  
= mtDNA haplogroup D

## Microsatellite gene pools

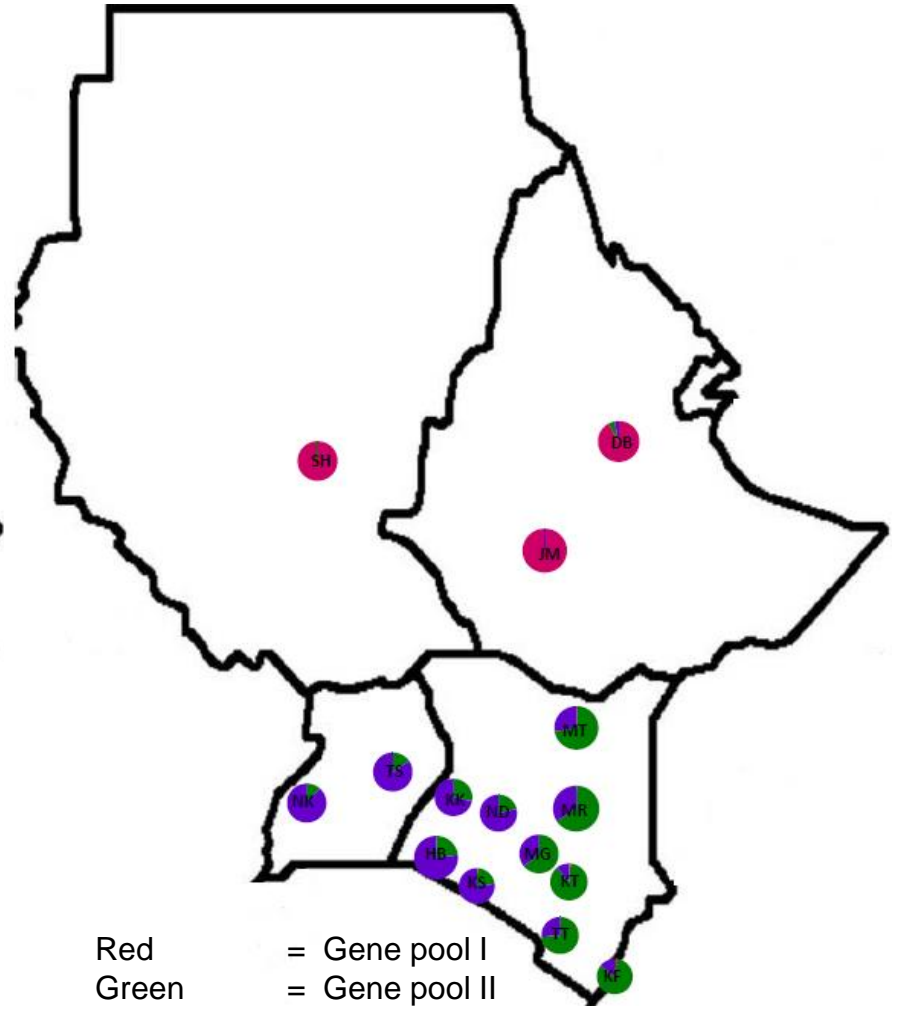

Red  
Green  
Purple

= Gene pool I  
= Gene pool II  
= Gene pool III
