# Supplementary material for: Reconstructing the origin and dispersal patterns of village chickens across East Africa: insights from autosomal markers
Source: PubMed Central journal article supplement (PMC3664419; doi:10.1111/mec.12294), 2013-04-24
Supplement: mec0022-2683-SD2.pdf [file mec0022-2683-SD2.pdf]

## Supplementary Information - S1

### Characteristics of the alleles observed at the microsatellites loci in East African village chicken

In this study we used the 30 autosomal microsatellite markers recommended by ISAG/FAO Advisory Committee on genetic diversity in domestic animals (FAO 1998). Here we used the panel on a large sample of free-range scavenging East African village chickens. We observed a total of 285 alleles some of which had alleles outside the expected allele size range reported previously (FAO 1998, Supplementary Table S2).

From the 30 markers, five loci (MCW0216, MCW0034, MCW0037, MCW0284 and ADL0278) revealed alleles that differed by a single base pair, while 14 (MCW0216, MCW0014, MCW0183, ADL0278, MCW0104, MCW0069, MCW0034, LEI0234, MCW0016, MCW0037, LEI0094, MCW0284, LEI0192 and MCW0081), show imperfect tandem repeat allelic patterns characterized by alleles differing by a single or an uneven number of base pair alleles. To investigate whether these were not artefacts or results of scoring errors and/or double peak readings, all genotypes were double blind scored independently by five people who were conversant with microsatellites. They all returned similar results. Also, we further re-genotyped majority of the individuals with these allele patterns and each time we observed the same pattern. Another researcher working independently on Korean native chickens also observed the same pattern while another one working in The Netherlands also observed the same pattern in Ethiopian local chickens. In the published domain, similar uneven allelic patterns have also been observed in several studies (Crooijmans *et al.* 1996; Vanhala *et al.* 1998; Romanov & Weigend 2001). Using 22 out of the 30 microsatellites used in this study and genotyped in local European and Asian chicken breeds using a similar capillary sequencer (ABI 3100 Genetic Analyzer; Applied Biosystems) as the one used in our study, Berthouly *et al.* (2008) also identified unambiguously alleles with sizes differing only by one base pair in eight of the loci. Also, some of the individuals exhibiting such patterns ("atypical" alleles)

have recently been sequenced (Yin *et al.* 2011; Wei *et al.* 2011) and this has indeed confirmed the pattern to be true.

It is therefore most likely that the observed allelic patterns are an inherent characteristic of the markers in East African village chickens and they may represent either alleles that have arisen recently in these populations or have been present in the ancestral population but might have been lost in commercial breeds as a consequence of a different breeding history.

## References

Berthouly C, Bed'Hom B, Tixier-Boichard M *et al.* (2008) Using molecular markers and multivariate methods to study the genetic diversity of local European and Asian chicken breeds. *Animal Genetics*, **39**, 121-129.

FAO (1998) *Secondary Guidelines for Development of National Farm Animal Genetic Resources Management Plans. Measurement of Domestic Animal Diversity (MoDAD): Recommended Microsatellite Markers*. FAO/UNEP, Rome, Italy 58pp.

Crooijmans RPMA, Groen ABF, van Kampen AJA *et al.* (1996) Microsatellite Polymorphism in Commercial Broiler and Layer Lines Estimated Using Pooled Blood Samples. *Poultry Science*, **75**, 904-909.

Romanov MN, Weigend S (2001) Analysis of genetic relationships between various populations of domestic and jungle fowl using microsatellite markers. *Poultry Science*, **80**, 1057-1063.

Vanhala T, Tuiskula-Haavisto M, Elo K *et al.* (1998) Evaluation of genetic variability and genetic distances between eight chicken lines using microsatellite markers. *Poultry Science*, **77**, 783-790.

Wei MQ, Zeng SC, Wei YM, Han J (2011) DNA sequence variations of alleles at two chicken microsatellite loci of MCW0216 and LEI0234. *Asian Journal of Animal Sciences*, **5**, 349-357.

Yin J, Zeng SC, Luo YZ, Han J (2011) Intensive DNA sequence characterization of alleles at MCW0330 and LEI0094 microsatellite loci in chicken. *Asian Journal of Animal and Veterinary Advances*, **6**, 805-813.

## Supplementary Information - Tables

**Supplementary Table S1.** Characteristics of the ecological zones of the study area and the respective gene pools observed in each eco-zone.

| Country/<br>Population | Eco-<br>zone* | Description                    | Moisture<br>index | Dominant<br>Gene pool |
|------------------------|---------------|--------------------------------|-------------------|-----------------------|
| Kenya                  |               |                                |                   |                       |
| <i>East Kenya</i>      |               |                                |                   |                       |
| Kilifi                 | II            | Coastal humid to dry sub-humid | -10               | II                    |
| Taita                  | II            | Inland humid to dry sub-humid  | -10               | II                    |
| Muranga                | II            | Humid                          | < -10             | II                    |
| Kitui                  | IV            | Semi arid                      | -30 to -40        | II                    |
| Meru                   | III           | Dry sub-humid to semi arid     | -20 to -30        | II                    |
| Marsabit               | V             | Arid                           | -40 to -50        | II                    |
| <i>West Kenya</i>      |               |                                |                   |                       |
| Kisii                  | II            | Humid                          | < -10             | III                   |
| Nandi                  | II            | Humid                          | < -10             | III                   |
| Homa Bay               | II            | Inland humid to dry sub-humid  | -10               | III                   |
| Kakamega               | II            | Humid                          | < -10             | III                   |
| Uganda                 |               |                                |                   |                       |
| Teso                   | II            | Humid                          | -10               | III                   |
| Nkonjo                 | II            | Humid                          | -10               | III                   |
| Ethiopia               |               |                                |                   |                       |
| Debre                  | II            | Humid                          | < -10             | I                     |
| Berhan                 |               |                                |                   |                       |
| Jimma                  | III           | Dry sub-humid to semi arid     | -20 to -30        | I                     |
| Sudan                  |               |                                |                   |                       |
| Shilluk                | V             | Arid                           | -40 to -50        | I                     |

\*Pratt D.J., Greenway P.J. & Gwynne M.D. (1966) A classification of East African rangeland, with an appendix on terminology. *The Journal of Applied Ecology*, **3**, 369–82.

**Supplementary Table S2.** Characteristics of the thirty ISAG/FAO recommended microsatellite markers used in the current study

| Locus       | Sample size | No. of alleles | He            | Ho            | PIC           | AR          | Allele size range |           |
|-------------|-------------|----------------|---------------|---------------|---------------|-------------|-------------------|-----------|
|             |             |                |               |               |               |             | This study        | FAO*      |
| MCW0123     | 655         | 10             | 0.673         | 0.650         | 0.643         | 6.796       | 71 - 93           | 76 - 100  |
| MCW0216     | 655         | 8              | 0.702         | 0.453         | 0.650         | 5.300       | 134 - 151         | 139 - 149 |
| MCW0034     | 657         | 13             | 0.805         | 0.731         | 0.780         | 8.662       | 212 - 241         | 212 - 246 |
| ADL0268     | 657         | 6              | 0.711         | 0.591         | 0.670         | 5.663       | 100 - 114         | 102 - 116 |
| MCW0016     | 648         | 14             | 0.761         | 0.657         | 0.725         | 7.204       | 127 - 175         | 162 - 206 |
| LEI0094     | 653         | 20             | 0.816         | 0.671         | 0.794         | 10.413      | 236 - 287         | 247 - 287 |
| MCW0165     | 652         | 5              | 0.575         | 0.319         | 0.495         | 3.198       | 112 - 126         | 114 - 118 |
| MCW0020     | 652         | 4              | 0.741         | 0.670         | 0.692         | 4.000       | 177 - 183         | 179 - 185 |
| MCW0222     | 654         | 4              | 0.662         | 0.564         | 0.597         | 3.992       | 215 - 221         | 220 - 226 |
| MCW0103     | 654         | 4              | 0.421         | 0.399         | 0.339         | 2.368       | 260 - 268         | 266 - 270 |
| MCW0295     | 651         | 10             | 0.702         | 0.619         | 0.664         | 7.092       | 82 - 106          | 88 - 106  |
| MCW0037     | 652         | 6              | 0.673         | 0.517         | 0.615         | 5.064       | 148 - 153         | 154 - 160 |
| LEI0234     | 651         | 25             | 0.898         | 0.751         | 0.889         | 13.805      | 196 - 373         | 216 - 364 |
| MCW0081     | 657         | 10             | 0.562         | 0.510         | 0.511         | 5.746       | 109 - 140         | 112 - 135 |
| MCW0014     | 657         | 9              | 0.344         | 0.139         | 0.326         | 5.269       | 161 - 180         | 164 - 182 |
| MCW0284     | 635         | 3              | 0.519         | 0.438         | 0.418         | 2.886       | 236 - 245         | 235 - 243 |
| MCW0183     | 649         | 12             | 0.755         | 0.704         | 0.725         | 7.251       | 286 - 324         | 296 - 326 |
| ADL0112     | 653         | 6              | 0.579         | 0.557         | 0.520         | 4.529       | 120 - 130         | 120 - 134 |
| MCW0104     | 657         | 17             | 0.671         | 0.560         | 0.643         | 9.114       | 183 - 231         | 190 - 234 |
| MCW0098     | 657         | 3              | 0.462         | 0.408         | 0.356         | 2.041       | 255 - 259         | 261 - 265 |
| MCW0111     | 656         | 10             | 0.654         | 0.613         | 0.619         | 5.620       | 92 - 118          | 96 - 120  |
| MCW0069     | 654         | 11             | 0.749         | 0.700         | 0.710         | 7.384       | 152 - 174         | 158 - 176 |
| MCW0206     | 657         | 13             | 0.742         | 0.673         | 0.700         | 6.581       | 218 - 248         | 221 - 249 |
| LEI0166     | 655         | 5              | 0.483         | 0.447         | 0.431         | 3.158       | 338 - 354         | 354 - 370 |
| ADL0278     | 655         | 13             | 0.764         | 0.592         | 0.723         | 5.993       | 108 - 180         | 114 - 126 |
| MCW0067     | 657         | 7              | 0.718         | 0.584         | 0.667         | 4.910       | 170 - 182         | 176 - 186 |
| LEI0192     | 645         | 20             | 0.811         | 0.553         | 0.786         | 9.956       | 247 - 349         | 244 - 370 |
| MCW0078     | 654         | 5              | 0.579         | 0.468         | 0.538         | 4.500       | 134 - 142         | 135 - 147 |
| MCW0248     | 655         | 4              | 0.424         | 0.388         | 0.367         | 3.420       | 212 - 220         | 205 - 225 |
| MCW0330     | 654         | 8              | 0.707         | 0.580         | 0.655         | 5.098       | 254 - 286         | 256 - 300 |
| <b>Mean</b> | <b>657</b>  | <b>9.50</b>    | <b>0.6554</b> | <b>0.5502</b> | <b>0.6083</b> | <b>5.90</b> |                   |           |

\* FAO (1998) *Secondary Guidelines for Development of National Farm Animal Genetic Resources Management Plans. Measurement of Domestic Animal Diversity (MoDAD): Recommended Microsatellite Markers*. FAO/UNEP, Rome, Italy 58pp.

<http://dad.fao.org/cgi-bin/getblob.cgi?sid=6e227435d25a608081d877656f3f3a32,50006220>

## Results after removal of individuals with less than 90% of each gene pools genotype proportion

**Supplementary Table S3.** Number of shared alleles between the three gene pools observed in the current study

| Gene Pool combination | Number of alleles | Proportion (%) out of the total number of alleles observed (274) |
|-----------------------|-------------------|------------------------------------------------------------------|
| I and II              | 13                | 4.744                                                            |
| I and III             | 7                 | 2.554                                                            |
| II and III            | 24                | 8.759                                                            |
| I, II and III         | 162               | 59.124                                                           |

**Supplementary Table S4a.** Total number of gene pool specific alleles observed from the analysis of thirty microsatellite markers in 15 chicken populations

| Gene Pool | Number of Alleles |
|-----------|-------------------|
| I         | 13                |
| II        | 26                |
| III       | 27                |
| Total     | 66                |

**Supplementary Table S4b.** Gene pool specific alleles and their frequencies

| Gene Pool    | Locus   | Allele   | Frequency |
|--------------|---------|----------|-----------|
| Gene pool I  | MCW0016 | 130      | 0.017699  |
|              | LEI0094 | 258      | 0.004587  |
|              | MCW0103 | 260      | 0.027273  |
|              | MCW0295 | 106      | 0.009009  |
|              | LEI0234 | 373      | 0.009009  |
|              |         | 369      | 0.004505  |
|              | MCW0081 | 140      | 0.008850  |
|              | MCW0014 | 178      | 0.070796  |
|              | MCW0183 | 322      | 0.009009  |
|              | MCW0206 | 226      | 0.022124  |
|              | LEI0166 | 338      | 0.004464  |
|              | LEI0192 | 284      | 0.013274  |
|              |         | 309      | 0.004425  |
|              |         | 349      | 0.004425  |
| Gene pool II | MCW0123 | 71       | 0.003165  |
|              |         | 79       | 0.006329  |
|              | MCW0034 | 216      | 0.003165  |
|              |         | 237      | 0.003165  |
|              |         | 212      | 0.009494  |
|              |         | 224      | 0.012658  |
|              | MCW0016 | 142      | 0.003165  |
|              |         | 127      | 0.003165  |
|              | MCW0295 | 98       | 0.006452  |
|              | LEI0234 | 340      | 0.009677  |
|              |         | 320      | 0.003226  |
|              | 357     | 0.003226 |           |

|               |         |     |          |
|---------------|---------|-----|----------|
|               | MCW0183 | 286 | 0.009677 |
|               |         | 307 | 0.003226 |
|               | MCW0104 | 202 | 0.006329 |
|               |         | 220 | 0.031646 |
|               |         | 212 | 0.006329 |
|               | MCW0111 | 106 | 0.012658 |
|               | MCW0069 | 167 | 0.003205 |
|               | LEI0166 | 342 | 0.006329 |
|               | ADL0278 | 124 | 0.003165 |
|               |         | 180 | 0.003165 |
|               |         | 121 | 0.003165 |
|               | LEI0192 | 260 | 0.009615 |
|               |         | 247 | 0.006410 |
|               |         | 256 | 0.016026 |
|               |         | 345 | 0.006410 |
|               |         |     |          |
| Gene pool III | MCW0123 | 89  | 0.036184 |
|               | MCW0216 | 151 | 0.003289 |
|               | MCW0016 | 152 | 0.006711 |
|               |         | 165 | 0.003356 |
|               |         | 175 | 0.003356 |
|               | LEI0094 | 254 | 0.006579 |
|               |         | 256 | 0.029605 |
|               |         | 244 | 0.003289 |
|               | MCW0165 | 118 | 0.009868 |
|               | LEI0234 | 365 | 0.003289 |
|               |         | 361 | 0.003289 |
|               |         | 324 | 0.003289 |
|               | MCW0081 | 113 | 0.003289 |
|               |         | 129 | 0.009868 |
|               | MCW0014 | 167 | 0.009868 |
|               | MCW0183 | 296 | 0.003289 |
|               | MCW0104 | 231 | 0.006579 |
|               |         | 198 | 0.085526 |
|               | MCW0111 | 116 | 0.003289 |
|               | MCW0206 | 218 | 0.009868 |
|               |         | 234 | 0.006579 |
|               |         | 244 | 0.006579 |
|               | ADL0278 | 120 | 0.003289 |
|               | LEI0192 | 321 | 0.006667 |
|               | MCW0330 | 256 | 0.003289 |
|               |         | 276 | 0.026316 |
|               |         | 272 | 0.023026 |

**Supplementary Table S5.** Measures of allelic and genetic diversity for each population after excluding individuals with less than 90% of their genotype proportion from each gene pool

| Population         | Code | N   | Allelic Diversity |             |             | Pa          | Genetic Diversity |                 |                 |
|--------------------|------|-----|-------------------|-------------|-------------|-------------|-------------------|-----------------|-----------------|
|                    |      |     | TNA               | MNA (SD)    | AR (SD)     |             | ENA (SD)          | He (SD)         | Ho (SD)         |
| Kenya              |      |     |                   |             |             |             |                   |                 |                 |
| Kilifi             | KF   | 39  | 183               | 6.10 (2.58) | 4.73 (1.53) | 3.07 (1.04) | 8                 | 0.6440 (0.0238) | 0.5632 (0.0145) |
| Taita              | TT   | 20  | 154               | 5.13 (2.26) | 4.60 (1.81) | 3.16 (1.39) | 3                 | 0.6413 (0.0299) | 0.5698 (0.0202) |
| Kitui              | MG   | 37  | 167               | 5.57 (2.54) | 4.51 (1.70) | 3.12 (1.39) | 2                 | 0.6326 (0.0287) | 0.5567 (0.0149) |
| Muranga            | KT   | 13  | 137               | 4.57 (1.98) | 4.48 (1.89) | 2.98 (1.46) | 0                 | 0.6307 (0.0288) | 0.5889 (0.0250) |
| Meru               | MR   | 18  | 148               | 4.93 (2.00) | 4.54 (1.65) | 3.09 (1.18) | 2                 | 0.6485 (0.0249) | 0.5664 (0.0214) |
| Marsabit           | MT   | 25  | 148               | 4.93 (1.84) | 4.40 (1.48) | 2.92 (1.09) | 2                 | 0.6310 (0.0218) | 0.5037 (0.0184) |
| Nandi              | ND   | 26  | 166               | 5.53 (2.57) | 4.72 (1.80) | 3.26 (1.29) | 4                 | 0.6582 (0.0259) | 0.5998 (0.0176) |
| Kisii              | KS   | 27  | 169               | 5.63 (2.71) | 4.80 (1.96) | 3.31 (1.63) | 0                 | 0.6556 (0.0254) | 0.5882 (0.0173) |
| Homa Bay           | HB   | 26  | 164               | 5.47 (2.32) | 4.62 (1.70) | 3.03 (1.26) | 1                 | 0.6288 (0.0276) | 0.5526 (0.0178) |
| Kakamega           | KK   | 18  | 167               | 5.57 (2.78) | 4.98 (2.17) | 3.29 (1.40) | 5                 | 0.6682 (0.0233) | 0.6089 (0.0211) |
| Overall            | KE   | 249 | 253               | 8.43 (4.71) | 8.40 (4.68) | 3.41 (1.48) | 27                | 0.6619 (0.0231) | 0.5672 (0.0057) |
| Ethiopia           |      |     |                   |             |             |             |                   |                 |                 |
| Debre Berhan       | DB   | 34  | 150               | 5.00 (2.10) | 4.01 (1.51) | 2.57 (1.40) | 2                 | 0.5390 (0.0344) | 0.4806 (0.0157) |
| Jimma              | JM   | 42  | 156               | 5.20 (2.50) | 4.06 (1.56) | 2.52 (1.37) | 5                 | 0.5422 (0.0302) | 0.4523 (0.0141) |
| Overall            | ET   | 76  | 179               | 5.97 (2.89) | 5.92 (2.86) | 2.70 (1.61) | 7                 | 0.5556 (0.0318) | 0.4648 (0.0105) |
| Uganda             |      |     |                   |             |             |             |                   |                 |                 |
| Teso               | TS   | 30  | 156               | 5.20 (2.25) | 4.31 (1.60) | 2.74 (1.18) | 5                 | 0.5820 (0.0310) | 0.5270 (0.0167) |
| Nkonjo             | NK   | 31  | 140               | 4.67 (2.04) | 4.11 (1.58) | 2.76 (1.14) | 2                 | 0.5875 (0.0319) | 0.5209 (0.0164) |
| Overall            | UG   | 61  | 175               | 5.83 (2.59) | 5.80 (2.57) | 2.84 (1.21) | 7                 | 0.5954 (0.0294) | 0.5240 (0.0117) |
| Sudan              |      |     |                   |             |             |             |                   |                 |                 |
| Shilluk            | SH   | 37  | 144               | 4.80 (2.19) | 3.81 (1.38) | 2.31 (0.93) | 6                 | 0.5132 (0.0310) | 0.4568 (0.0151) |
| Across East Africa | EA   | 423 | 274               | 9.13 (5.41) | 4.84 (1.81) | 3.38 (1.63) | 47                | 0.6528 (0.0244) | 0.5329 (0.0044) |
